# Supplementary material
Source: Springer Nature journal article supplement (https://www.springermedizin.de/resource/supplementary/12955_2009_656_MOESM2_ESM.pdf/9561016)

# SDS-Scores of NEI-VFQ results evaluating first stroke VFD-patients compared to healthy controls

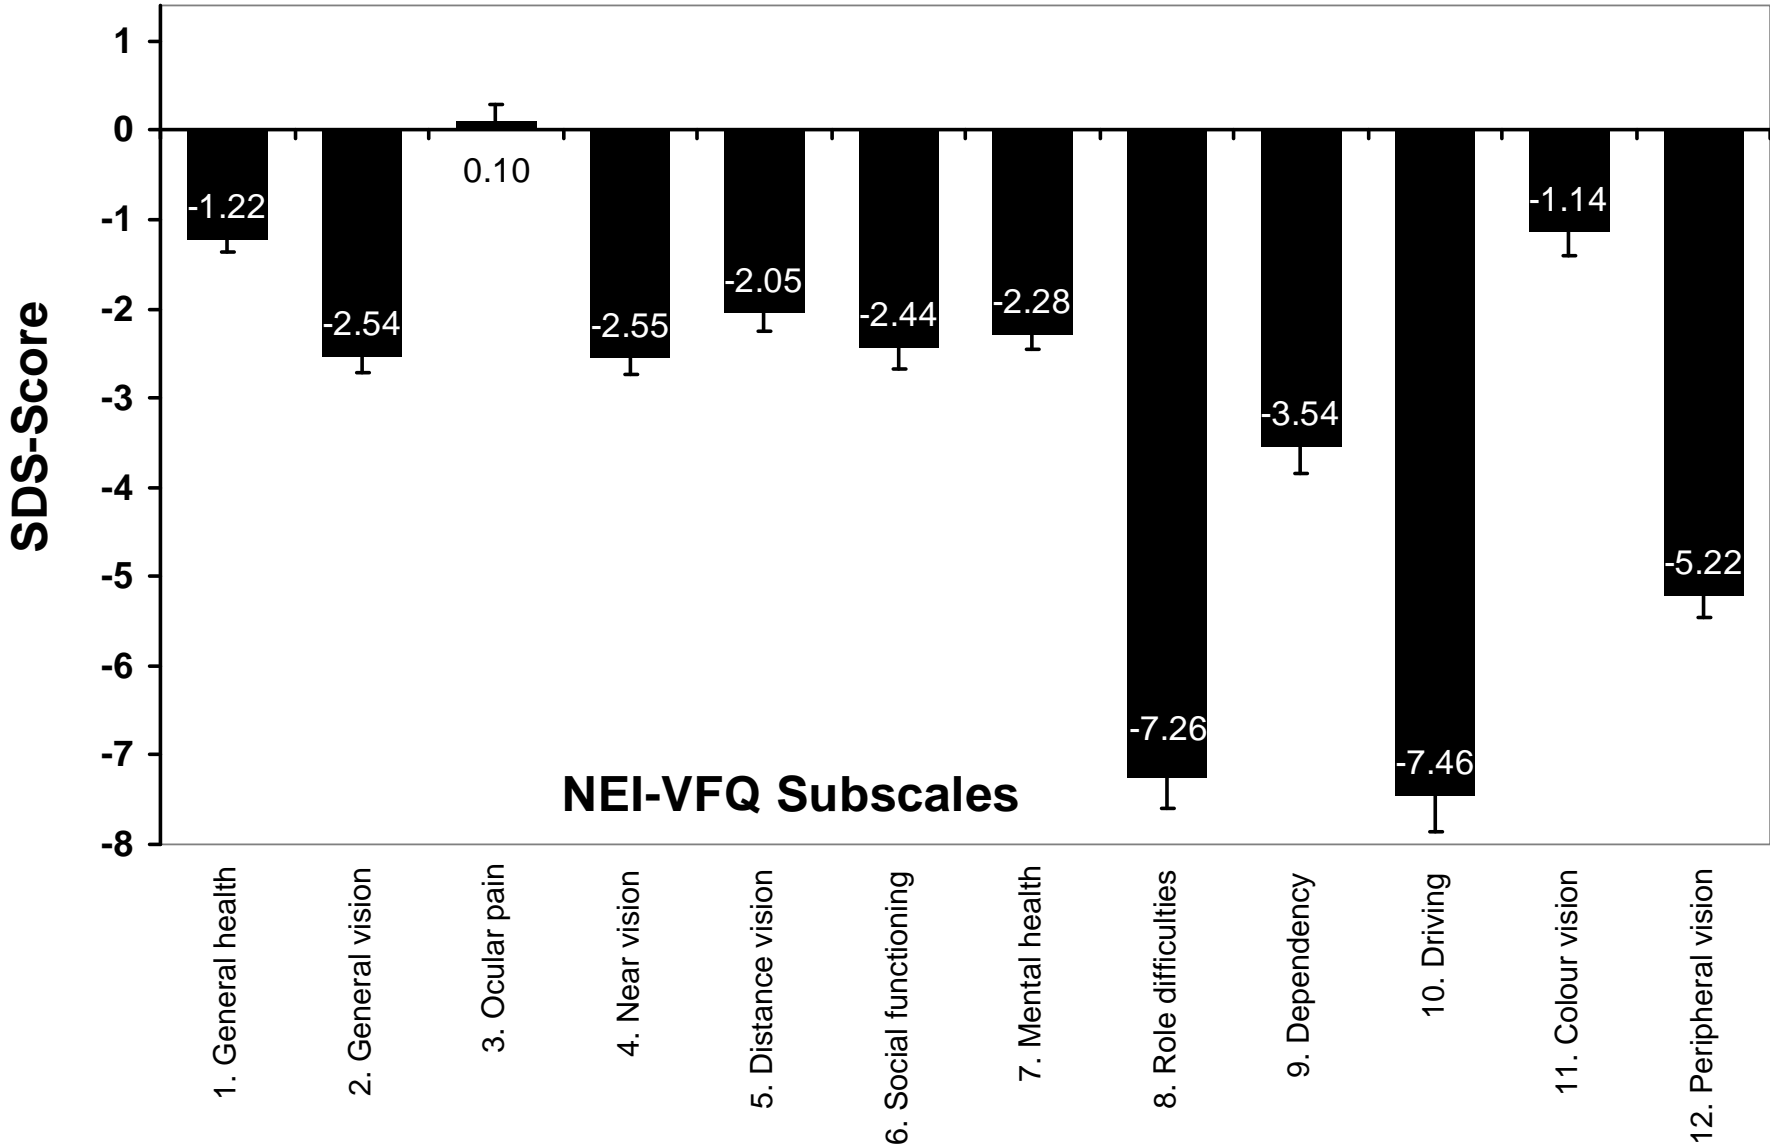

Supplement: MOESM2 [file 9561016]
